# Supplementary material for: Highly efficient and ultra-stable boron-doped graphite felt electrodes for vanadium redox flow batteries
Source: Royal Society of Chemistry journal article supplement (doi:10.1039/c8ta03388a), 2018-01-01
Supplement: c8ta03388a1.pdf [file c8ta03388a1.pdf]

## Supporting information

### **Highly efficient and ultra-stable boron-doped graphite felt electrodes for vanadium redox flow batteries**

H.R. Jiang, W. Shyy, L. Zeng, R.H. Zhang, T.S. Zhao\*  
Department of Mechanical and Aerospace Engineering,  
The Hong Kong University of Science and Technology,  
Clear Water Bay, Kowloon, Hong Kong, China

---

\*Corresponding author. Tel.: (852) 2358 8647 E-mail: [metzhao@ust.hk](mailto:metzhao@ust.hk) (T.S. Zhao)

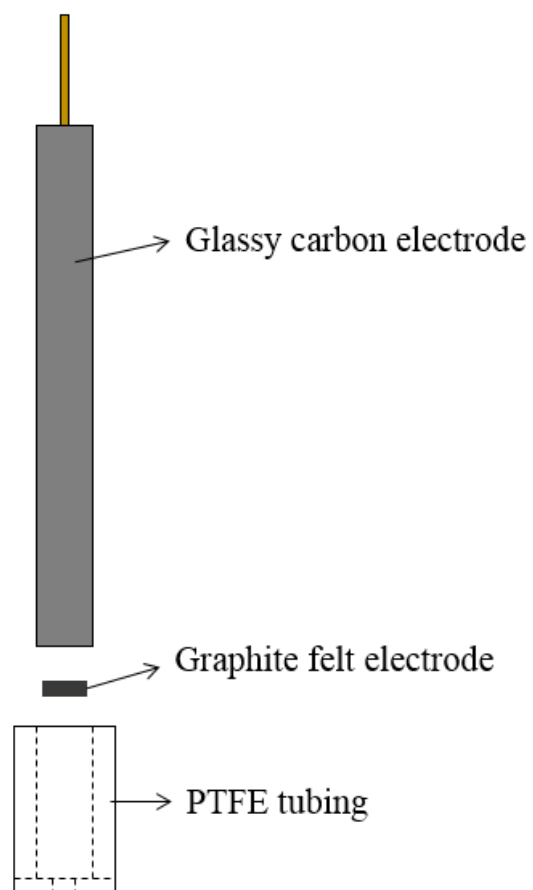

**Fig. S1.** The schematic of setup in the CV tests.

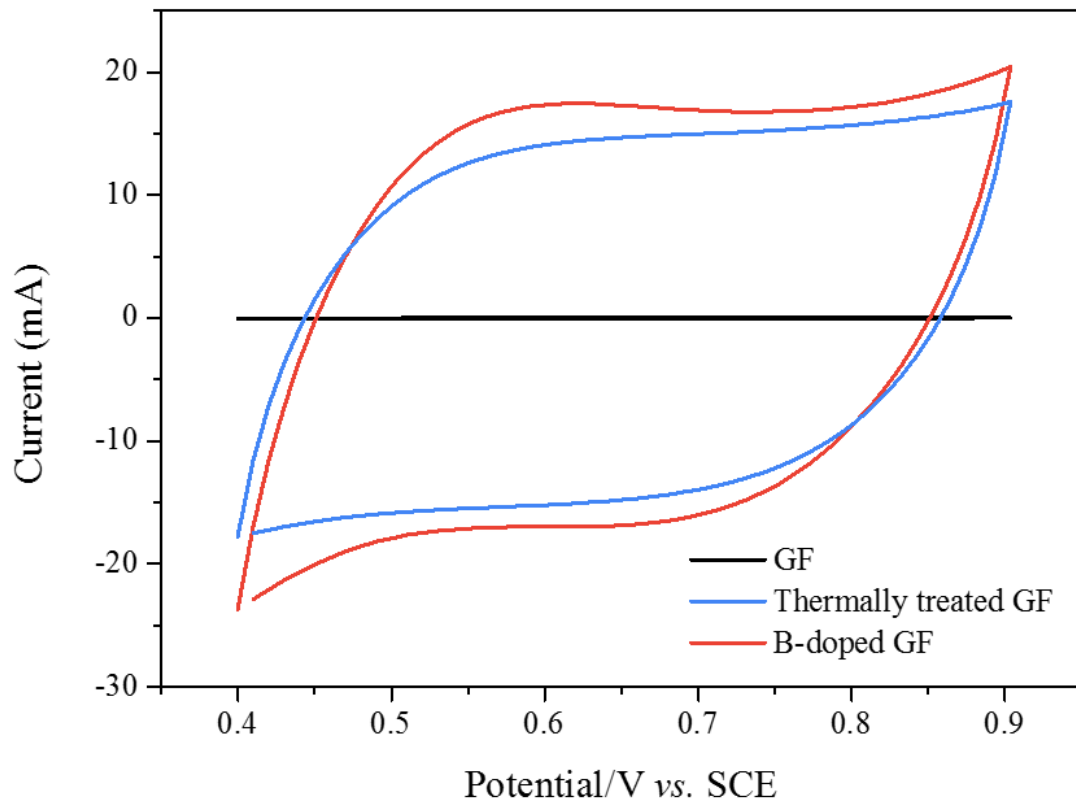

**Fig. S2.** The electrochemical double-layer capacitances for original, thermally treated and boron-doped graphite felts.
